# Supplementary material for: Butyrate limits human natural killer cell effector function
Source: PubMed Central journal article supplement (PMC9932090; doi:10.1038/s41598-023-29731-5), 2023-02-15

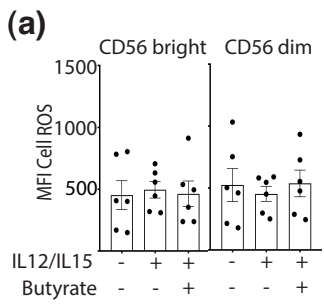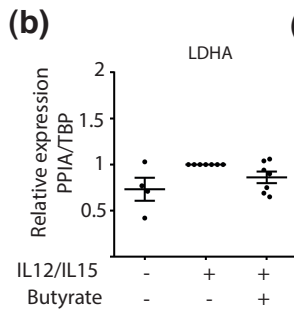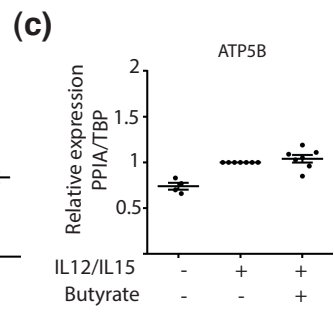

Supplement: 41598_2023_29731_MOESM3_ESM.pdf [file 41598_2023_29731_MOESM3_ESM.pdf]
